# Supplementary material for: Maternal Vitamin D Status at Week 30 of Gestation and Offspring Cardio-Metabolic Health at 20 Years: A Prospective Cohort Study over Two Decades
Source: PubMed Central journal article supplement (PMC5072548; doi:10.1371/journal.pone.0164758), 2016-10-20

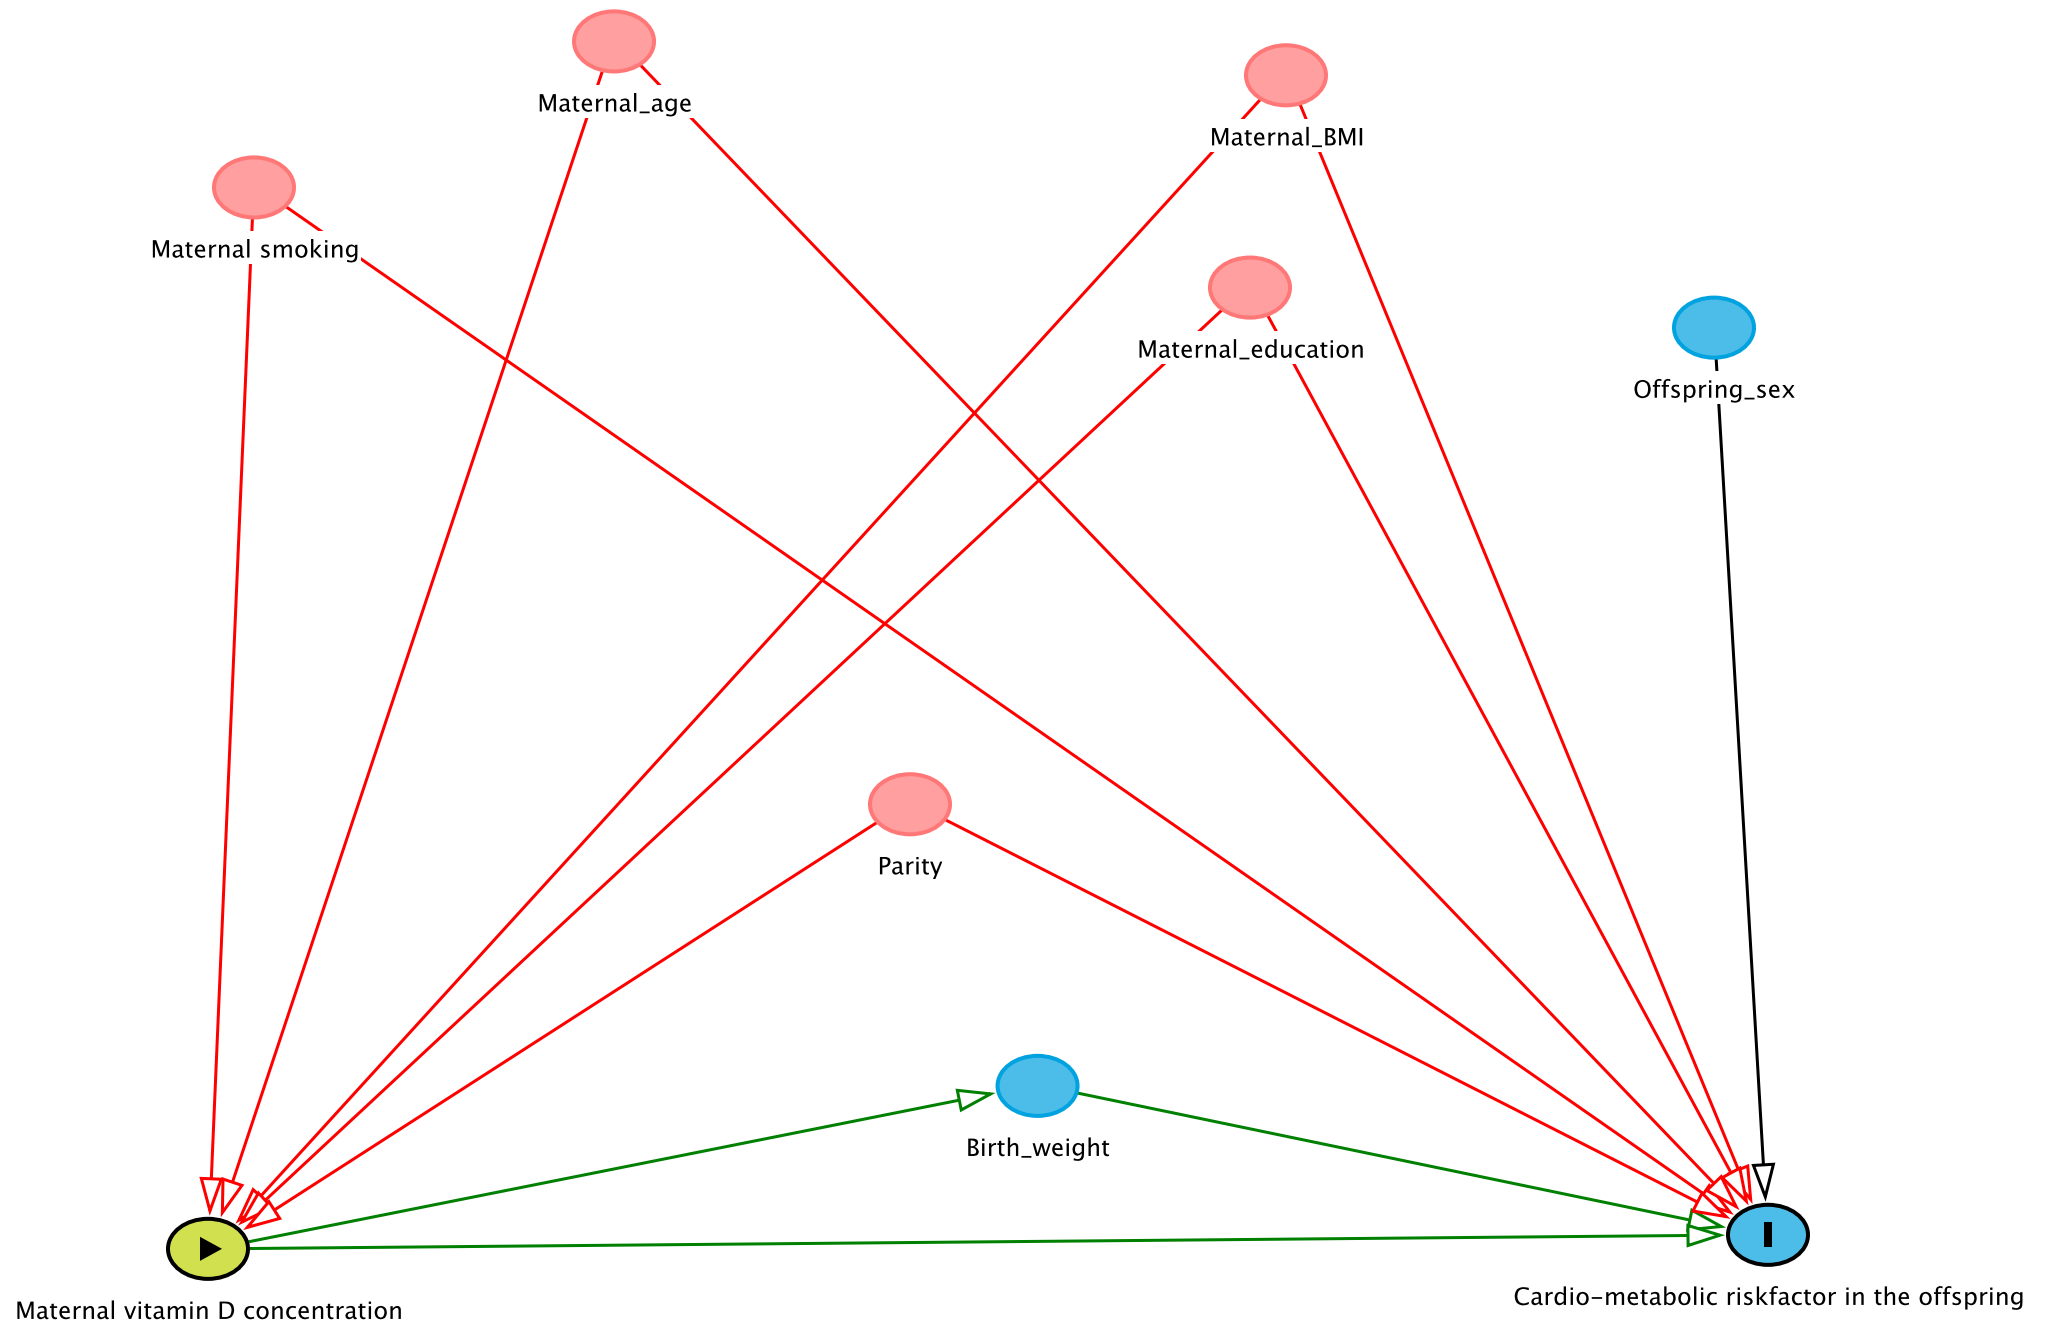

Supplement: pone.0164758.s002.pdf [file pone.0164758.s002.pdf]
