# Supplementary material for: Maternal Vitamin D Status at Week 30 of Gestation and Offspring Cardio-Metabolic Health at 20 Years: A Prospective Cohort Study over Two Decades
Source: PubMed Central journal article supplement (PMC5072548; doi:10.1371/journal.pone.0164758), 2016-10-20
Supplement: pone.0164758.s003.pdf [file pone.0164758.s003.pdf]

|                                             | Level of participation     |                          |                        |                              |
|---------------------------------------------|----------------------------|--------------------------|------------------------|------------------------------|
| Maternal/offspring characteristics          | Clinical examination (410) | Questionnaire only (234) | No participation (206) | No exposure information (65) |
| <b>Maternal characteristics<sup>2</sup></b> |                            |                          |                        |                              |
| Smoking                                     | 146 (37%)                  | 79 (36%)                 | 98 (50%)               | 21 (39%)                     |
| Parity                                      |                            |                          |                        |                              |
| 0                                           | 242 (60%)                  | 131 (57%)                | 107 (54%)              | 40 (65%)                     |
| 1                                           | 134 (31%)                  | 78 (34%)                 | 66 (34%)               | 15 (24%)                     |
| ≥2                                          | 40 (10%)                   | 20 (9%)                  | 24 (12%)               | 7 (11%)                      |
| Prepregnancy BMI, kg/m <sup>2</sup>         | 21.4 ± 3.1                 | 21.1 ± 2.5               | 21.8 ± 3.8             | 21.6 ± (2.7)                 |
| Age, years                                  | 29.2 ± 4.0                 | 29.1 ± 4.0               | 28.8 ± 4.6             | 29.0 ± 4.7                   |
| Education                                   |                            |                          |                        |                              |
| Elementary school                           | 35 (9%)                    | 26 (13%)                 | 41 (22%)               | 7 (13%)                      |
| High-school or technical school             | 84 (22%)                   | 53 (25%)                 | 65 (35%)               | 12 (23%)                     |
| University                                  | 155 (41%)                  | 80 (38%)                 | 54 (29%)               | 22 (42%)                     |
| Higher academic                             | 75 (20%)                   | 38 (18%)                 | 11 (6%)                | 7 (13%)                      |
| Other                                       | 32 (8%)                    | 11 (5%)                  | 15 (8%)                | 5 (9%)                       |
| Vitamin D, nmol/L                           | 82.6 ± 41.0                | 78.1 ± 39.2              | 78.6 ± 40.9            | -                            |
| <b>Offspring</b>                            |                            |                          |                        |                              |

**characteristics<sup>3</sup>**

|                                           |            |            |           |              |
|-------------------------------------------|------------|------------|-----------|--------------|
| Sex, male                                 | 162 (40%)  | 144 (62%)  | 139 (67%) | 31 (48%)     |
| Birth weight, g                           | 3.5 ± 0.5  | 3.6 ± 0.5  | 3.4 ± 0.5 | 3.3 ± 0.6    |
| Gestational age, days                     | 283 ± 11.2 | 283 ± 12   | 282 ± 11  | 282.6 ± 12.5 |
| Smoking                                   |            |            |           | -            |
| Current                                   | 69 (17%)   | 48 (21%)   | -         | -            |
| Ex-                                       | 18 (5%)    | 8 (3%)     | -         | -            |
| Occasional                                | 104 (26%)  | 49 (21%)   | -         | -            |
| Never                                     | 208 (52%)  | 124 (54%)  | -         | -            |
| Parental overweight <sup>4</sup> ,<br>yes | 143 (37%)  | 84 (38%)   | -         | -            |
| Self-reported BMI,<br>kg/m <sup>2</sup>   | 21.8 ± 2.8 | 22.5 ± 3.0 | -         | -            |
| Exercise, yes                             | 299 (75%)  | 158 (68%)  | -         | -            |
| Strenuous exercise <sup>5</sup> , yes     | 248 (64%)  | 127 (57%)  | -         | -            |
